# Supplementary material for: Genome-Wide Characterization of TAZ Binding Sites in Mammary Epithelial Cells
Source: MDPI journal article supplement (doi:10.3390/cancers15194713), 2023-09-25

## **Supplemental Figure legends**

### **Figure S1 Identification TAZ binding patterns for its targets.**

Representative images of TAZ binding peaks on genomic loci of CTGF and CYR61 (A); ANKRD1 and CCDC80 (B); KIBRA and AMOTL2 (C) in response to Dox treatment.

### **Figure S2 TAZ directly binds to TEAD and FOSL transcription factor promoters.**

- A. Representative images of TAZ binding peaks on promoter regions of TEAD1, 2 and 4, but not TEAD2.
- B. Representative images of TAZ binding peaks on promoter and upstream enhancer regions of FOSL1 and FOSL2.

**Supplemental Table S1: KEGG pathway analysis in response to TAZ activation.**

|    | Cluster    | GeneRatio | pvalue   | p.adjust | qvalue   | Count | Description                                                                          |
|----|------------|-----------|----------|----------|----------|-------|--------------------------------------------------------------------------------------|
| 1  | early.up   | 38/302    | 9.25E-22 | 2.40E-19 | 2.28E-19 | 38    | Cell cycle - Homo sapiens (human)                                                    |
| 2  | early.up   | 13/302    | 1.30E-10 | 1.68E-08 | 1.60E-08 | 13    | DNA replication - Homo sapiens (human)                                               |
| 3  | early.up   | 27/302    | 8.76E-10 | 7.56E-08 | 7.19E-08 | 27    | Motor proteins - Homo sapiens (human)                                                |
| 4  | early.up   | 19/302    | 1.68E-07 | 1.09E-05 | 1.04E-05 | 19    | Oocyte meiosis - Homo sapiens (human)                                                |
| 5  | early.up   | 11/302    | 2.93E-06 | 0.000152 | 0.000144 | 11    | Fanconi anemia pathway - Homo sapiens (human)                                        |
| 6  | early.up   | 11/302    | 5.59E-05 | 0.002335 | 0.002221 | 11    | p53 signaling pathway - Homo sapiens (human)                                         |
| 7  | early.up   | 13/302    | 6.31E-05 | 0.002335 | 0.002221 | 13    | Progesterone-mediated oocyte maturation - Homo sapiens (human)                       |
| 8  | early.up   | 8/302     | 8.18E-05 | 0.002649 | 0.002519 | 8     | Homologous recombination - Homo sapiens (human)                                      |
| 9  | early.up   | 6/302     | 0.000119 | 0.003412 | 0.003245 | 6     | Mismatch repair - Homo sapiens (human)                                               |
| 10 | early.up   | 15/302    | 0.000438 | 0.011347 | 0.010791 | 15    | Cellular senescence - Homo sapiens (human)                                           |
| 11 | early.up   | 7/302     | 0.000845 | 0.0199   | 0.018925 | 7     | Base excision repair - Homo sapiens (human)                                          |
| 12 | early.up   | 10/302    | 0.001105 | 0.023857 | 0.022688 | 10    | Gap junction - Homo sapiens (human)                                                  |
| 13 | late.up    | 13/280    | 8.67E-07 | 0.000253 | 0.000242 | 13    | Biosynthesis of amino acids - Homo sapiens (human)                                   |
| 14 | late.up    | 8/280     | 3.97E-05 | 0.005797 | 0.005538 | 8     | Glycine, serine and threonine metabolism - Homo sapiens (human)                      |
| 15 | late.up    | 11/280    | 0.000442 | 0.043019 | 0.041096 | 11    | AGE-RAGE signaling pathway in diabetic complications - Homo sapiens (human)          |
| 16 | early.down | 17/365    | 1.11E-07 | 3.25E-05 | 3.16E-05 | 17    | Complement and coagulation cascades - Homo sapiens (human)                           |
| 17 | early.down | 14/365    | 5.72E-05 | 0.008381 | 0.00816  | 14    | Staphylococcus aureus infection - Homo sapiens (human)                               |
| 18 | early.down | 9/365     | 0.000104 | 0.010183 | 0.009914 | 9     | ABC transporters - Homo sapiens (human)                                              |
| 19 | late.down  | 29/233    | 2.24E-09 | 6.09E-07 | 5.61E-07 | 29    | Cytokine-cytokine receptor interaction - Homo sapiens (human)                        |
| 20 | late.down  | 13/233    | 3.17E-06 | 0.000432 | 0.000398 | 13    | Viral protein interaction with cytokine and cytokine receptor - Homo sapiens (human) |
| 21 | late.down  | 10/233    | 6.31E-06 | 0.000572 | 0.000527 | 10    | Steroid hormone biosynthesis - Homo sapiens (human)                                  |
| 22 | late.down  | 13/233    | 1.38E-05 | 0.000935 | 0.000861 | 13    | TNF signaling pathway - Homo sapiens (human)                                         |
| 23 | late.down  | 12/233    | 2.63E-05 | 0.00143  | 0.001317 | 12    | NF-kappa B signaling pathway - Homo sapiens (human)                                  |
| 24 | late.down  | 11/233    | 0.000107 | 0.004553 | 0.004194 | 11    | Amoebiasis - Homo sapiens (human)                                                    |
| 25 | late.down  | 9/233     | 0.000117 | 0.004553 | 0.004194 | 9     | Epithelial cell signaling in Helicobacter pylori infection - Homo sapiens (human)    |
| 26 | late.down  | 10/233    | 0.000225 | 0.007424 | 0.006838 | 10    | Rheumatoid arthritis - Homo sapiens (human)                                          |
| 27 | late.down  | 10/233    | 0.000246 | 0.007424 | 0.006838 | 10    | IL-17 signaling pathway - Homo sapiens (human)                                       |
| 28 | late.down  | 9/233     | 0.001564 | 0.041509 | 0.038232 | 9     | Hematopoietic cell lineage - Homo sapiens (human)                                    |
| 29 | late.down  | 9/233     | 0.001679 | 0.041509 | 0.038232 | 9     | AGE-RAGE signaling pathway in diabetic complications - Homo sapiens (human)          |
| 30 | late.down  | 9/233     | 0.002205 | 0.049987 | 0.046041 | 9     | C-type lectin receptor signaling pathway - Homo sapiens (human)                      |

A

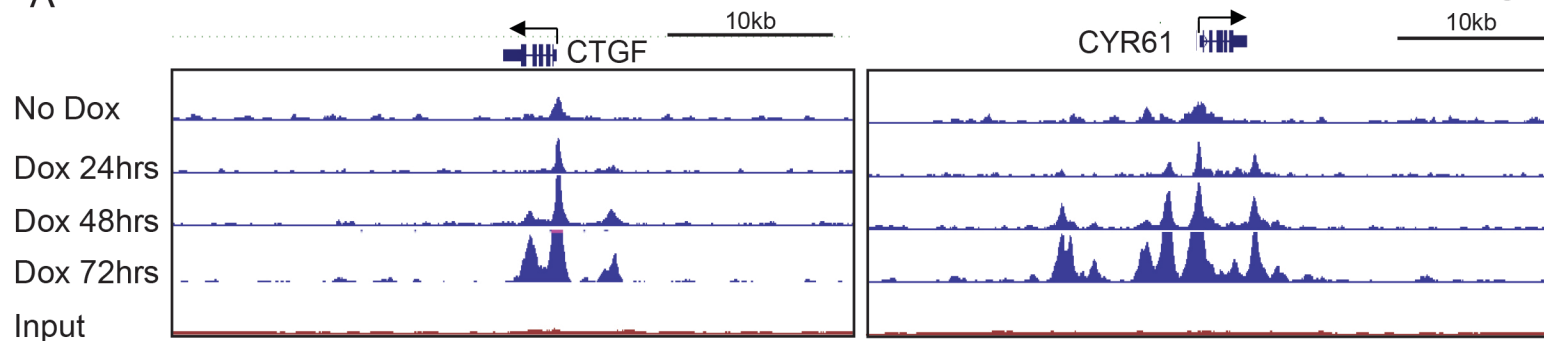

B

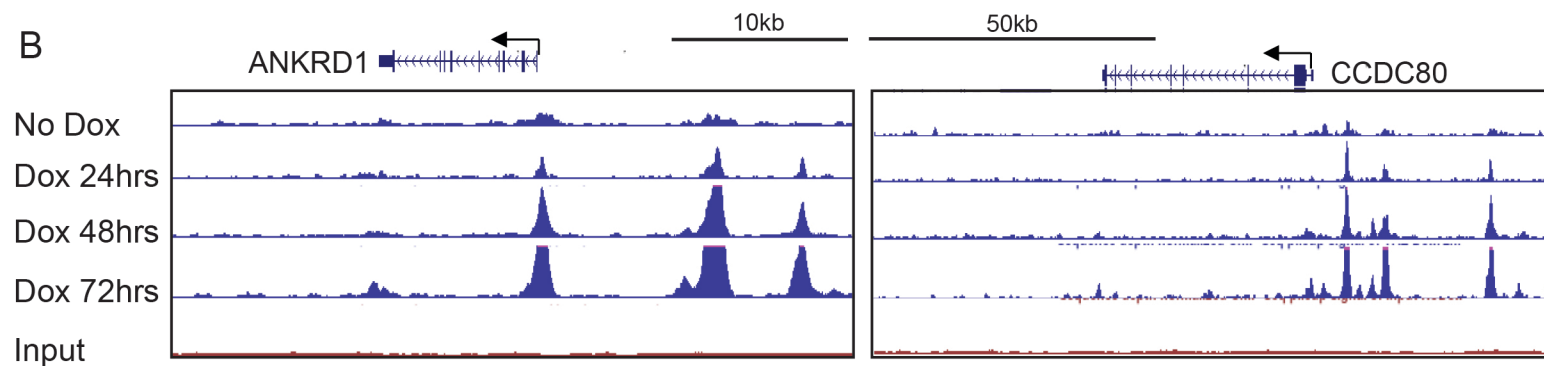

C

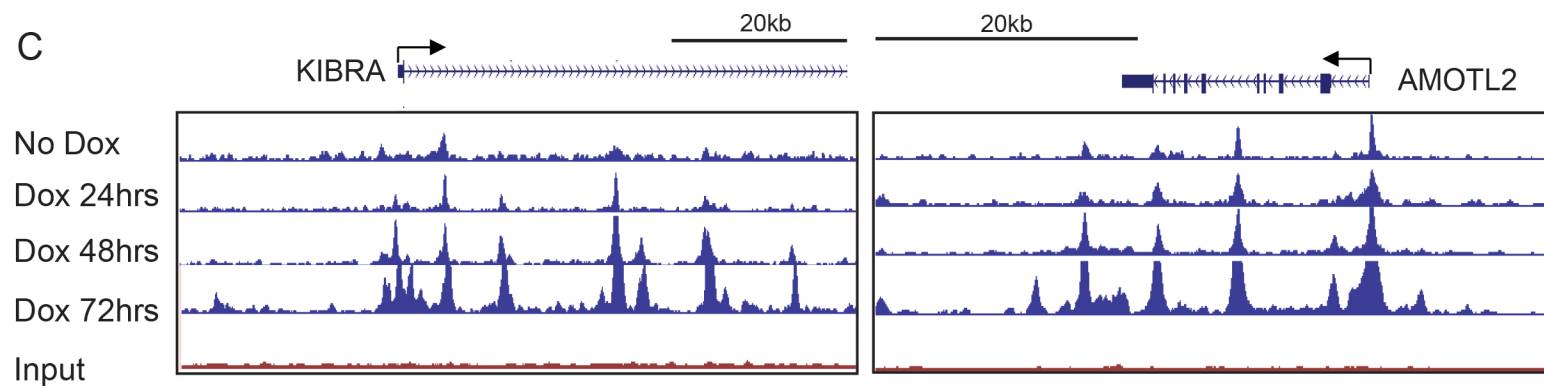

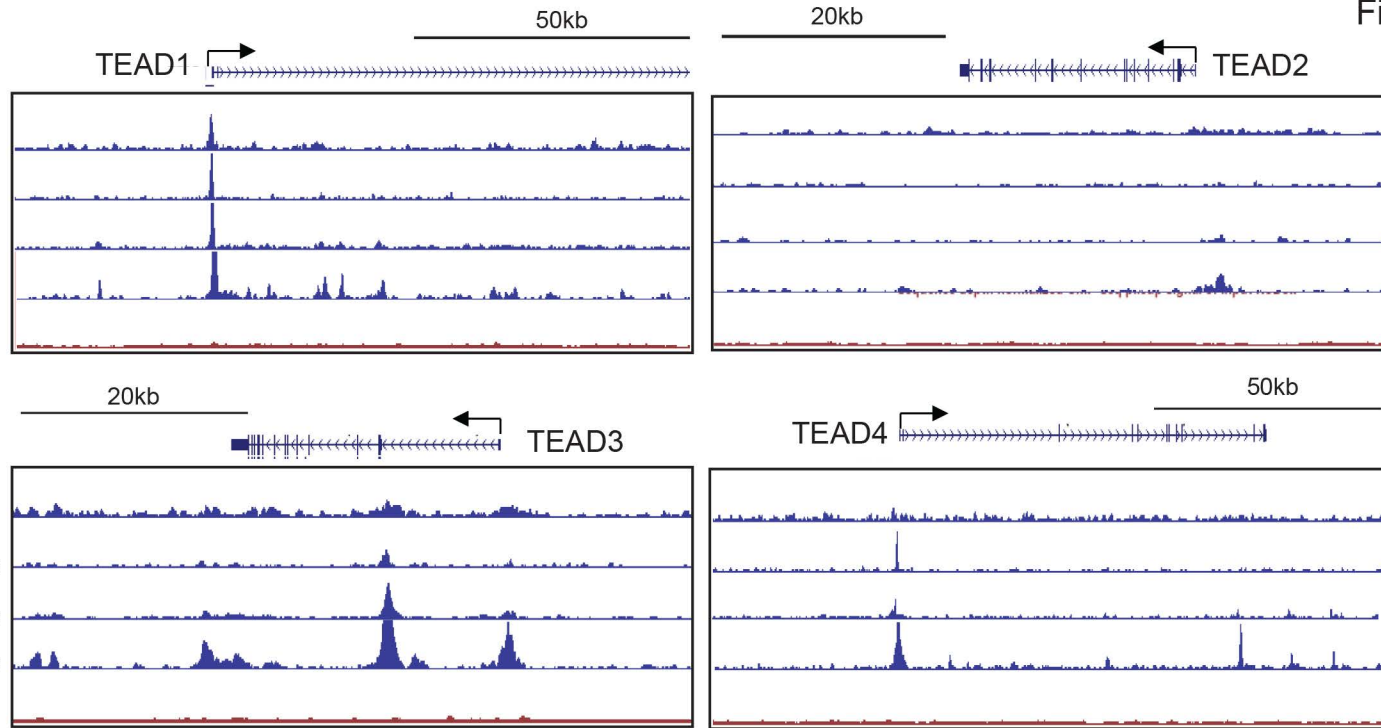

B

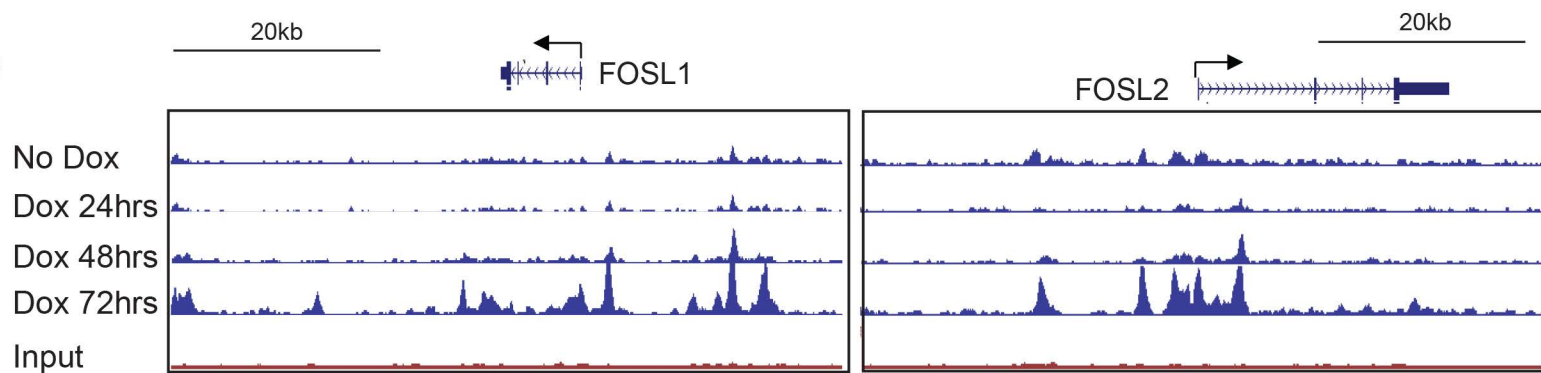

Supplement: s1 [file s1]
