# Supplementary figures and images for: Genome-Wide Characterization of TAZ Binding Sites in Mammary Epithelial Cells
Source: MDPI journal article supplement (doi:10.3390/cancers15194713), 2023-09-25

Original western blot

Figure 1A.

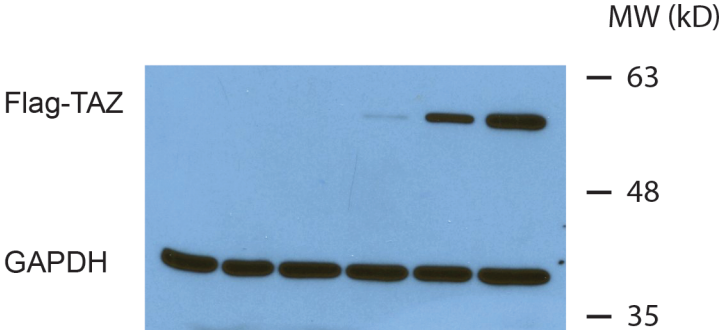

Figure 1B.

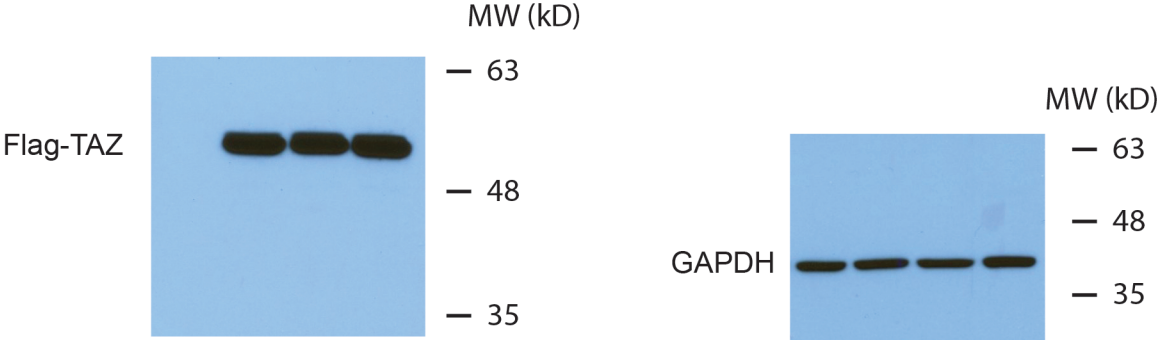

Supplement: s1 [file s1]
